# Supplementary material for: Exploring the Association of Household Location and Sociodemographic Profile on Decreasing Dietary Diversity in Occupied Palestine: A Serial Cross-Sectional Study
Source: Research Square preprint supplement (doi:10.21203/rs.3.rs-6474000/v1), 2025-05-16
Supplement: Supplementary file 1 [file d0866af8e761709a31afc070.docx]

**Table 1:** Descriptive characteristics of households (N = 23,129) amongst 4 waves (2014, 2016, 2018, 2020) of Socio-Economic Conditions Surveys done by the State of Palestine

|  | **Overall** | **2014** | | **2016** | | **2018** | **2020** |
| --- | --- | --- | --- | --- | --- | --- | --- |
|  | (N=23129) | (n=7900) | | (n=2195) | | (n=9925) | (n=3109) |
| **Median FCS [Min, Max]** | 80 [3, 112] | 81 [15, 112] | | 84 [16·5, 112] | | 79 [3, 112] | 78 [10·5, 112] |
| **Household Locality** |  |  | |  | |  |  |
| Urban | 16764 (72·5%) | 5606 (71·0%) | | 1424 (64·9%) | | 7491 (75·5%) | 2243 (72·1%) |
| Rural | 3868 (16·7%) | 1468 (18·6%) | | 451 (20·5%) | | 1438 (14·5%) | 511 (16·4%) |
| Refugee Camp | 2497 (10·8%) | 826 (10·5%) | | 320 (14·6%) | | 996 (10·0%) | 355 (11·4%) |
| **Households in West Bank** | 14138 (61·1%) | 4892 (61·9%) | | 1255 (57·2%) | | 5897 (59·4%) | 2094 (67·4%) |
| Living in Area C | 980 (4·2%) | 283 (3·6%) | | 172 (7·8%) | | 420 (4·2%) | 105 (3·4%) |
| Inside barrier wall | 993 (4·3%) | 449 (5·7%) | | 121 (5·5%) | | 301 (3·0%) | 122 (3·9%) |
| Outside barrier wall | 13138 (56·8%) | 4435 (56·1%) | | 1134 (51·7%) | | 5597 (56·4%) | 1972 (63·4%) |
| **Households in Gaza** | 8991 (38·9%) | 3008 (38·1%) | | 940 (42·8%) | | 4028 (40·6%) | 1015 (32·6%) |
| <1000 m from buffer zone | 603 (2·6%) | 269 (3·4%) | | 25 (1·1%) | | 272 (2·7%) | 37 (1·2%) |
| >1000 m from buffer zone | 8385 (36·3%) | 2737 (34·6%) | | 915 (41·7%) | | 3755 (37·8%) | 978 (31·5%) |
| **Extent that mobility restrictions impacted household** | | | | | | | |
| Not at all | 13270 (57·4%) | 4005 (50·7%) | | 1595 (72·7%) | | 6185 (62·3%) | 1485 (47·8%) |
| Minor | 5459 (23·6%) | 1730 (21·9%) | | 354 (16·1%) | | 2403 (24·2%) | 972 (31·3%) |
| Very much | 4173 (18·0%) | 2100 (26·6%) | | 232 (10·6%) | | 1209 (12·2%) | 632 (20·3%) |
| Don't know | 198 (0·9%) | 59 (0·7%) | | 13 (0·6%) | | 126 (1·3%) | 0 (0%) |
| **Head of Household Characteristics** | | | | | | | |
| Median number of household members [Min, Max] | 5·00 [1, 27] | 6·00 [1, 25] | | 5·00 [1, 27] | | 5·00 [1, 27] | 5·00 [1, 17] |
| Male | 20931 (90·5%) | 7148 (90·5%) | | 1990 (90·7%) | | 8966 (90·3%) | 2827 (90·9%) |
| Married | 20876 (90·3%) | 7111 (90·0%) | | 1973 (89·9%) | | 8975 (90·4%) | 2817 (90·6%) |
| Highest level of education received: secondary | 10748 (46·5%) | 3559 (45·1%) | | 1016 (46·3%) | | 4727 (47·6%) | 1446 (46·5%) |
| Works 35+ hours | 11689 (50·5%) | 3694 (46·8%) | | 1220 (55·6%) | | 5247 (52·9%) | 1528 (49·1%) |
| Not a refugee | 13215 (57·1%) | 4584 (58·0%) | | 1113 (50·7%) | | 5787 (58·3%) | 1731 (55·7%) |
| Received aid | 14439 (62·4%) | 4519 (57·2%) | | 1334 (60·8%) | | 6660 (67·1%) | 1926 (61·9%) |
| Received food assistance | 6510 (28·1%) | 2427 (30·7%) | | 623 (28·4%) | | 2567 (25·9%) | 893 (28·7%) |
| *Household income | | |  | | | | |
| Rich | 902 (4·3%) | 271 (3·4%) | | ·· | | 461 (4·6%) | 170 (5·5%) |
| Middle | 14841 (70·9%) | 5826 (73·7%) | | ·· | | 6939 (69·9%) | 2076 (66·8%) |
| Poor | 3743 (17·9%) | 1368 (17·3%) | | | ·· | 1765 (17·8%) | 610 (19·6%) |
| Very poor | 1441 (6·9%) | 434 (5·5%) | | | ·· | 759 (7·7%) | 248 (8·0%) |
| *To calculate total proportion, did not include 2016 values in the denominator so N = 20934 | | | | | | | |

**Table 2:** Proportion of households with unacceptable FCS (< 35) by location and sociodemographic factors

|  |  |  | **Survey Year** | | | |
| --- | --- | --- | --- | --- | --- | --- |
|  | **Total** | **P-value** | **2014** | **2016** | **2018** | **2020** |
|  | (N=23129) |  | (n=7900) | (n=2195) | (n=9925) | (n=3109) |
| **Unacceptable FCS (%)** | 509 (2·2%) |  | 62 (0·8%) | 9 (0·4%) | 322 (3·2%) | 116 (3·7%) |
| **Location of Household** |  |  |  |  |  |  |
| Urban | 408 (1·8%) | ref | 45 (0·6%) | 7 (0·3%) | 261 (2·6%) | 95 (3·1%) |
| Rural | 56 (0·2%) | *<0·001 | 7 (0·1%) | 1 (0·0% | 40 (0·4%) | 8 (0·2%) |
| Refugee camps | 45 (0·2%) | *<0·001 | 10 (0·1%) | 1 (0·0%) | 21 (0·2%) | 13 (0·4%) |
| **Households in West Bank** | 302 (1·3%) | ref | 25 (0·3%) | 6 (0·3%) | 188 (1·9%) | 83 (2·7%) |
| Inside barrier wall | 18 (0·1%) | ref | 0 (0·0%) | 3 (0·1%) | 12 (0·1%) | 3 (0·1%) |
| Outside barrier wall | 284 (1·2%) | 0·996 | 25 (0·3%) | 3 (0·1%) | 176 (1·8%) | 80 (2·6%) |
| ***Area C (West Bank only)*** | 295 (1·3%) |  | 25 (0·3%) | 6 (0·3%) | 184 (1·9%) | 80 (2·6%) |
| Yes | 22 (0·1%) | ref | 1 (0·0%) | 0 (0·0%) | 19 (0·2%) | 2 (0·1%) |
| No | 273 (1·2%) | *0·012 | 24 (0·3%) | 6 (0·3%) | 165 (1·7%) | 78 (2·5%) |
| **Households in Gaza** | 207 (0·9%) | *<0·001 | 37 (0·5%) | 3 (0·1%) | 134 (1·4%) | 33 (1·1%) |
| < 1000m from buffer zone | 9 (0·0%) | 0·183 | 4 (0·1%) | 0 (0·0%) | 4 (0·0%) | 1 (0·0%) |
| >1000m and more | 198 (0·9%) | 0·200 | 33 (0·4%) | 3 (0·1%) | 130 (1·3%) | 32 (1·0%) |
| ***Extent that mobility restrictions impacted household*** | | | | | | |
| Not at all | 285 (1·2%) | ref | 25 (0·3%) | 7 (0·3%) | 195 (2·0%) | 58 (1·9%) |
| Minor | 143 (0·6%) | *<0·001 | 16 (0·2%) | 2 (0·1%) | 90 (0·9%) | 35 (1·1%) |
| Very much | 71 (0·3%) | *0·024 | 20 (0·3%) | 0 (0·0%) | 28 (0·3%) | 23 (0·7%) |
| **Head of Household Characteristics** | | |  |  |  |  |
| ***Gender*** |  |  |  |  |  |  |
| Male | 436 (1·9%) | ref | 49 (0·6%) | 8 (0·4%) | 280 (2·8%) | 99 (3·2%) |
| Female | 73 (0·3%) | *<0·001 | 13 (0·2%) | 1 (0·0%) | 42 (0·4%) | 17 (0·5%) |
| ***Marital Status*** |  |  |  |  |  |  |
| Single/Divorced/Separated /Widow | 77 (0·3%) | ref | 11 (0·1%) | 1 (0·0%) | 47 (0·5%) | 18 (0·6%) |
| Married | 430 (1·9%) | *<0·001 | 49 (0·6%) | 8 (0·4%) | 275 (2·8%) | 98 (3·2%) |
| ***Highest level of education obtained*** | | |  |  |  |  |
| Elementary | 215 (0·9%) | ref | 32 (0·4%) | 5 (0·1%) | 128 (1·3%) | 50 (1·6%) |
| Secondary | 227 (1·0%) | *<0·001 | 22 (0·3%) | 2 (0·1%) | 151 (1·5%) | 52 (1·7%) |
| Intermediate and above | 65 (0·3%) | *<0·001 | 6 (0·1%) | 2 (0·0%) | 43 (0·4%) | 14 (0·5%) |
| ***Employment*** |  |  |  |  |  |  |
| Unemployed | 73 (0·3%) | ref | 10 (0·1%) | 3 (0·1%) | 50 (0·5%) | 10 (0·3%) |
| Working 1-24 hours | 199 (0·9%) | *<0·001 | 15 (0·2%) | 3 (0·1%) | 131 (1·3%) | 50 (1·6%) |
| Working 35+ hours | 235 (1·0%) | *<0·001 | 35 (0·4%) | 3 (0·1%) | 141 (1·4%) | 56 (1·8%) |
| ***Refugee Status*** |  |  |  |  |  |  |
| Not a refugee | 328 (1·4%) | ref | 30 (0·4%) | 6 (0·3%) | 221 (2·2%) | 71 (2·3%) |
| Refugee | 179 (0·8%) | *<0·001 | 30 (0·4%) | 3 (0·1%) | 101 (1·0%) | 45 (1·4%) |
| ***Received Aid*** |  |  |  |  |  |  |
| Yes | 202 (0·9%) | ref | 39 (0·5%) | 4 (0·2%) | 112 (1·1%) | 47 (1·5%) |
| No | 307 (1·3%) | *<0·001 | 23 (0·3%) | 5 (0·2%) | 210 (2·1%) | 69 (2·2%) |
| ****Household income*** |  |  |  |  |  |  |
| Rich | 5 (0·0%) | ref | 0 (0·0%) | ·· | 5 (0·1%) | 0 (0·0%) |
| Middle | 229 (1·1%) | 0·058 | 16 (0·2%) | ·· | 160 (1·6%) | 53 (1·7%) |
| Poor | 163 (0·8%) | *< 0·001 | 26 (0·3%) | ·· | 99 (1·0%) | 38 (1·2%) |
| Very poor | 103 (0·5%) | *<0·001 | 20 (0·3%) | ·· | 58 (0·6%) | 25 (0·8%) |
| *To calculate total proportion, did not include 2016 values in the denominator so N = 20934 | | | | | | |

**Table 3:** Crude and adjusted linear regression results for selected variable by region (West Bank and Gaza) with variables of interest associated with change in FCS using 2020 survey data (n=3109). The unadjusted model for West Bank is glm(totalFCS ~ barrier), while the adjusted is glm(totalFCS ~ barrier + mobility +head of household sex + education + employment + locality + household income + refugee status). The unadjusted model for Gaza is glm(totalFCS ~ mobility), while the adjusted is glm(totalFCS ~ mobility + edu + marital status + household income).

|  | **Crude  Coefficient** | **Crude p-value (95%CI)** | | **Adjusted Coefficient** | **Adjusted p-value (95%CI)** |
| --- | --- | --- | --- | --- | --- |
| **West Bank (n = 2094)** |  |  | |  |  |
| Intercept | 86·65 |  | | 74·7 |  |
| Living inside barrier | ref |  | | ref |  |
| Living outside barrier | -6·37 | *<0·001 (-9·95 – -2·79) | | -5·51 | *0·002 (-9·10 – -2·08) |
| Extent that mobility restrictions impacted household | | | | | |
| Not at all |  |  | | ref |  |
| Minor |  |  | | -0·68 | 0·47 (-2·56 – 1·18) |
| Very much |  |  | | 0·76 | 0·49 (-1·39 – 2·92) |
| Head of household sex |  |  | |  |  |
| Male |  |  | | ref |  |
| Female |  |  | | -2·51 | 0·093 (-5·42 – 0·42) |
| Head of household education |  |  | |  |  |
| Elementary |  |  | | ref |  |
| Secondary |  |  | | 2·45 | *0·016 (0·45 – 4·42) |
| Intermediate and above |  |  | | 5·27 | *<0·001 (2·97 – 7·54) |
| Locality |  |  | |  |  |
| Urban |  |  | | ref |  |
| Rural |  |  | | 2·90 | *0·004 (0·95 – 4·81) |
| Refugee camps |  |  | | -7·04 | *<0·001 (-10·12 – -4·00) |
| Household income |  |  | |  |  |
| Rich |  |  | | ref |  |
| Middle |  |  | | -2·61 | *0·026 (-5·81 – 0·59) |
| Poor |  |  | | -13·01 | *<0·001 (-16·89 – -9·12) |
| Very Poor |  |  | | -19·61 | *<0·001 (-26·67– -12·47) |
| Refugee status |  |  | |  |  |
| Not a refugee |  |  | | ref |  |
| Refugee |  |  | | 5·28 | *<0·001 (3·21 – 7·37) |
| **Gaza (n = 1015)** |  |  | |  |  |
| Intercept | 73·90 |  | | 77·59 |  |
| Extent that mobility restrictions impacted household | | |  | | |
| Not at all | ref |  | | ref |  |
| Minor | -3·40 | *0·010 (-5·97 – -0·83) | | -3·50 | *0·007 (68·98 – 86·19) |
| Very much | 2·85 | 0·059 (-0·11 – 5·80) | | 2·92 | 0·050 (-0·00 – 5·84) |
| Head of household education |  |  | |  |  |
| Elementary |  |  | | ref |  |
| Secondary |  |  | | 2·00 | 0·170 (-0·86 – 4·86) |
| Intermediate and above |  |  | | 4·06 | *0·014 (0·83 – 7·29) |
| Marital status |  |  | |  |  |
| Single/Divorced/Separated/ Widow |  |  | | ref |  |
| Married |  |  | | 4·0 | 0·049 (0·02 – 8·05) |
| Household Income |  |  | |  |  |
| Rich |  |  | | ref |  |
| Middle |  |  | | -7·57 | 0·054 (-15·27 – 0·13) |
| Poor |  |  | | -10·47 | 0·009 (-18·2 – -2·67) |
| Very Poor |  |  | | -13·04 | 0·001 (-21·01 – -5·07) |

~In 2020, median of household FCS in West Bank is 79·5 (SD: 19·6), median of household FCS in Gaza is 76·5 (SD: 18·4)
